# Supplementary material for: Essential Information for Transition of Care for Frail Elderly Patients in Japan: A Qualitative Study
Source: Research Square preprint supplement (doi:10.21203/rs.3.rs-122059/v1), 2020-12-08
Supplement: Supplementary file 1 [file 20218400a451e8d4525f2d52.docx]

**Consolidated criteria for reporting qualitative studies (COREQ): 32-item checklist**

Developed from:

Tong A, Sainsbury P, Craig J. Consolidated criteria for reporting qualitative research (COREQ): a 32-item checklist for interviews and focus groups. *International Journal for Quality in Health Care*. 2007. Volume 19, Number 6: pp. 349 – 357

| **No. Item** | **Guide questions/description** | **Reported on Page #** |
| --- | --- | --- |
| **Domain 1: Research team and reﬂexivity** |  |  |
| *Personal Characteristics* |  |  |
| 1. Inter viewer/facilitator | Which author/s conducted the inter view or focus group? | Methods, data collection paragraph 1, page 8 |
| 2. Credentials | What were the researcher’s credentials? E.g. PhD, MD | Methods, paragraph 1, page 7 |
| 3. Occupation | What was their occupation at the time of the study? | Methods, paragraph 1, page 7 |
| 4. Gender | Was the researcher male or female? | N/A |
| 5. Experience and training | What experience or training did the researcher have? | Methods, paragraph 1, page 7 |
| *Relationship with participants* |  |  |
| 6. Relationship established | Was a relationship established prior to study commencement? | N/A |
| 7. Participant knowledge of the interviewer | What did the participants know about the researcher? e.g. personal goals, reasons for doing the research | N/A |
| 8. Interviewer characteristics | What characteristics were reported about the inter viewer/facilitator? e.g. Bias, assumptions, reasons and interests in the research topic | Methods, paragraph 1, page 7 |
| **Domain 2: study design** |  |  |
| *Theoretical framework* |  |  |
| 9. Methodological orientation and Theory | What methodological orientation was stated to underpin the study? e.g. grounded theory, discourse analysis, ethnography, phenomenology, content analysis | Methods, paragraph 1, page 7 |
| *Participant selection* |  |  |
| 10. Sampling | How were participants selected? e.g. purposive, convenience, consecutive, snowball | Methods, Subjects and settings, paragraph 1, page 8 |
| 11. Method of approach | How were participants approached? e.g. face-to-face, telephone, mail, email | Methods, Subjects and settings, paragraph 1, page 8 |
| 12. Sample size | How many participants were in the study? | Methods, paragraph 1, Table |
| 13. Non-participation | How many people refused to participate or dropped out? Reasons? | N/A |
| *Setting* |  |  |
| 14. Setting of data collection | Where was the data collected? e.g. home, clinic, workplace | Methods, Subjects and settings, paragraph 2, page 8 |
| 15. Presence of non-participants | Was anyone else present besides the participants and researchers? | Methods, data collection, paragraph 1, page 8 |
| 16. Description of sample | What are the important characteristics of the sample? e.g. demographic data, date | Methods, paragraph 1, page 7, and Subjects and settings, paragraph 2, page 8 |
| *Data collection* |  |  |
| 17. Interview guide | Were questions, prompts, guides provided by the authors? Was it pilot tested? | Methods, paragraph 1, page 7 |
| 18. Repeat interviews | Were repeat inter views carried out? If yes, how many? | N/A |
| 19. Audio/visual recording | Did the research use audio or visual recording to collect the data? | Methods, Data analysis, paragraph 1, page 7 |
| 20. Field notes | Were ﬁeld notes made during and/or after the inter view or focus group? | N/A |
| 21. Duration | What was the duration of the inter views or focus group? | Methods, Data collection, paragraph 1, page 8 |
| 22. Data saturation | Was data saturation discussed? | Methods, Data analysis, paragraph 1, page 9 |
| 23. Transcripts returned | Were transcripts returned to participants for comment and/or correction? | Methods, Data analysis, paragraph 1, page 9 |
| **Domain 3: analysis and ﬁndings** |  |  |
| *Data analysis* |  |  |
| 24. Number of data coders | How many data coders coded the data? | Methods, Data analysis, paragraph 1, page 9 |
| 25. Description of the coding tree | Did authors provide a description of the coding tree? | N/A |
| 26. Derivation of themes | Were themes identiﬁed in advance or derived from the data? | Methods, Data analysis, paragraph 1, page 9 |
| 27. Software | What software, if applicable, was used to manage the data? | N/A |
| 28. Participant checking | Did participants provide feedback on the ﬁndings? | Methods, Data analysis, paragraph 1, page 9 |
| *Reporting* |  |  |
| 29. Quotations presented | Were participant quotations presented to illustrate the themes/ﬁndings? Was each quotation identiﬁed? e.g. participant number | Results, page 12- 20 |
| 30. Data and ﬁndings consistent | Was there consistency between the data presented and the ﬁndings? | Results, page 12- 20, Figure 1 |
| 31. Clarity of major themes | Were major themes clearly presented in the ﬁndings? | Figure 1 |
| 32. Clarity of minor themes | Is there a description of diverse cases or discussion of minor themes? | Figure 1 |

**Once you have completed this checklist, please save a copy and upload it as part of your submission. When requested to do so as part of the upload process, please select the file type: *Checklist*. You will NOT be able to proceed with submission unless the checklist has been uploaded. Please DO NOT** **include this checklist as part of the main manuscript document. It must be uploaded as a separate file.**
